# Supplementary material
Source: PubMed Central journal article supplement (PMC4469489)
Supplement: NIHMS663289-supplement-3.pdf [file NIHMS663289-supplement-3.pdf]

**Supplementary Table 1** | Catalytic efficiency of dC and dT incorporation opposite dG by WT and mutant Pol  $\nu$

| DNA / Pol $\nu$         | Correct (G – dCTP) |                                 |                                                     | Incorrect (G – dTTP) |                                 |                                                     | Fidelity          |
|-------------------------|--------------------|---------------------------------|-----------------------------------------------------|----------------------|---------------------------------|-----------------------------------------------------|-------------------|
|                         | $K_M$ ( $\mu$ M)   | $k_{cat}$ ( $\text{min}^{-1}$ ) | $k_{cat} / K_M$ ( $\text{M}^{-1} \text{min}^{-1}$ ) | $K_M$ ( $\mu$ M)     | $k_{cat}$ ( $\text{min}^{-1}$ ) | $k_{cat} / K_M$ ( $\text{M}^{-1} \text{min}^{-1}$ ) | dC/dT selectivity |
| 13/19mer-G / WT         | 149 $\pm$ 6        | 62.4 $\pm$ 1.2                  | 0.42 x 10 <sup>6</sup>                              | 627 $\pm$ 82         | 14.4 $\pm$ 1.0                  | 2.3 x 10 <sup>4</sup>                               | 18.3              |
| Coldspot / WT           | 16.7 $\pm$ 0.8     | 54.8 $\pm$ 0.8                  | 3.3 x 10 <sup>6</sup>                               | 294 $\pm$ 17         | 5.8 $\pm$ 0.1                   | 2.0 x 10 <sup>4</sup>                               | 165               |
| Hotspot / WT            | 7.9 $\pm$ 0.9      | 10.4 $\pm$ 0.3                  | 1.3 x 10 <sup>6</sup>                               | 86 $\pm$ 6           | 14.5 $\pm$ 0.3                  | 16.9 x 10 <sup>4</sup>                              | 7.7               |
| Coldspot / K679A        | 9.7 $\pm$ 0.3      | 103 $\pm$ 2                     | 10.6 x 10 <sup>6</sup>                              | 386 $\pm$ 87         | 2.3 $\pm$ 0.1                   | 6.0 x 10 <sup>3</sup>                               | 1782              |
| Hotspot / K679A         | 8.8 $\pm$ 0.4      | 15.1 $\pm$ 0.2                  | 1.7 x 10 <sup>6</sup>                               | 422 $\pm$ 47         | 11.2 $\pm$ 0.6                  | 2.7 x 10 <sup>4</sup>                               | 63.0              |
| Hotspot / E675R         | 3.7 $\pm$ 0.3      | 1.4 $\pm$ 0.1                   | 0.38 x 10 <sup>6</sup>                              | 35 $\pm$ 5           | 2.7 $\pm$ 0.1                   | 7.7 x 10 <sup>4</sup>                               | 4.9               |
| Hotspot / $\Delta$ Ins2 | 21.4 $\pm$ 0.7     | 13.2 $\pm$ 0.1                  | 0.62 x 10 <sup>6</sup>                              | 240 $\pm$ 7          | 14.4 $\pm$ 0.2                  | 6.0 x 10 <sup>4</sup>                               | 10.3              |

  

|                 |                                                             |
|-----------------|-------------------------------------------------------------|
| 13/19mer-G      | 5' GAGTCAACAGGTC<br>3' CTCAGTTGTCCAG <u>G</u> TATGG         |
| G(-66) coldspot | 5' TGAGTGAGCTAACT<br>3' ACTCACTCGATTGAG <u>T</u> GTAAATTAA  |
| G(164) hotspot  | 5' GCGATCGGTGCGGGC<br>3' CGCTAGCCACGCCCG <u>G</u> GAGAAGCGA |

**Supplementary Table 2** | Catalytic efficiency of WT and  $\Delta$ Ins2 Pol  $\nu$  with looped out primers

|                   | $K_m$ ( $\mu$ M) | $k_{cat}$ ( $\text{min}^{-1}$ ) | $k_{cat}/K_m$<br>( $\text{M}^{-1} \text{min}^{-1}$ ) | Relative efficiency (%) |       |
|-------------------|------------------|---------------------------------|------------------------------------------------------|-------------------------|-------|
| <u>Normal DNA</u> |                  |                                 |                                                      | to WT & normal DNA      |       |
| WT                | 245 $\pm$ 20     | 16.2 $\pm$ 0.50                 | 66.1 x 10 <sup>3</sup>                               | 100                     |       |
| $\Delta$ Ins2     | 789 $\pm$ 47     | 17.4 $\pm$ 0.57                 | 22.1 x 10 <sup>3</sup>                               | 33.3                    |       |
| <u>P[3,1] DNA</u> |                  |                                 |                                                      | to WT & P[3,1]          |       |
| WT                | 251 $\pm$ 12     | 7.0 $\pm$ 0.1                   | 27.9 x 10 <sup>3</sup>                               | 42.2                    | 100   |
| $\Delta$ Ins2     | 459 $\pm$ 41     | 2.3 $\pm$ 0.1                   | 5.0 x 10 <sup>3</sup>                                | 7.6                     | 17.9  |
| <u>P[3,2] DNA</u> |                  |                                 |                                                      | to WT / P[3,2]          |       |
| WT                | 369 $\pm$ 22     | 2.9 $\pm$ 0.1                   | 7.9 x 10 <sup>3</sup>                                | 12.0                    | 100   |
| $\Delta$ Ins2     | 310 $\pm$ 53     | 0.4 $\pm$ 0.02                  | 1.3 x 10 <sup>3</sup>                                | 2.0                     | 16.4% |
